# Supplementary material for: Imine-tautomers of aminothiazole derivatives: intriguing aspects of chemical reactivities
Source: Royal Society of Chemistry journal article supplement (doi:10.1039/c6ce00676k), 2016-01-01
Supplement: c6ce00676k1.pdf [file c6ce00676k1.pdf]

### Supporting Information:

## Imine-tautomers of Amino-thiazole Derivatives: Intriguing aspects of Chemical Reactivities

Nithi Phukan, Jubaraj B. Baruah\*

Department of Chemistry, Indian Institute of Technology Guwahati,

Guwahati-781 039, Assam, India, [juba@iitg.ernet.in](mailto:juba@iitg.ernet.in)

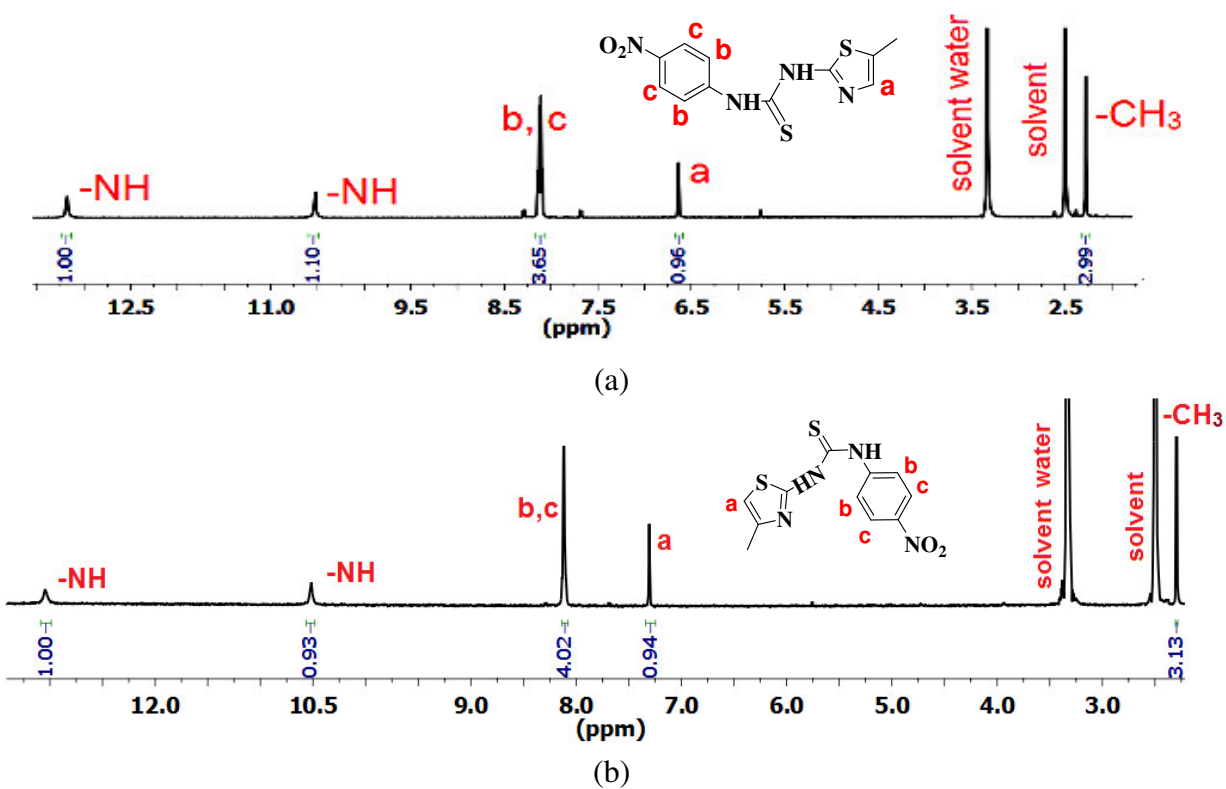

Figure S1:  $^1\text{H-NMR}$  (600 MHz,  $\text{DMSO-d}^6$ ) spectra of (a)  $\text{L}^1$  and (b)  $\text{L}^2$

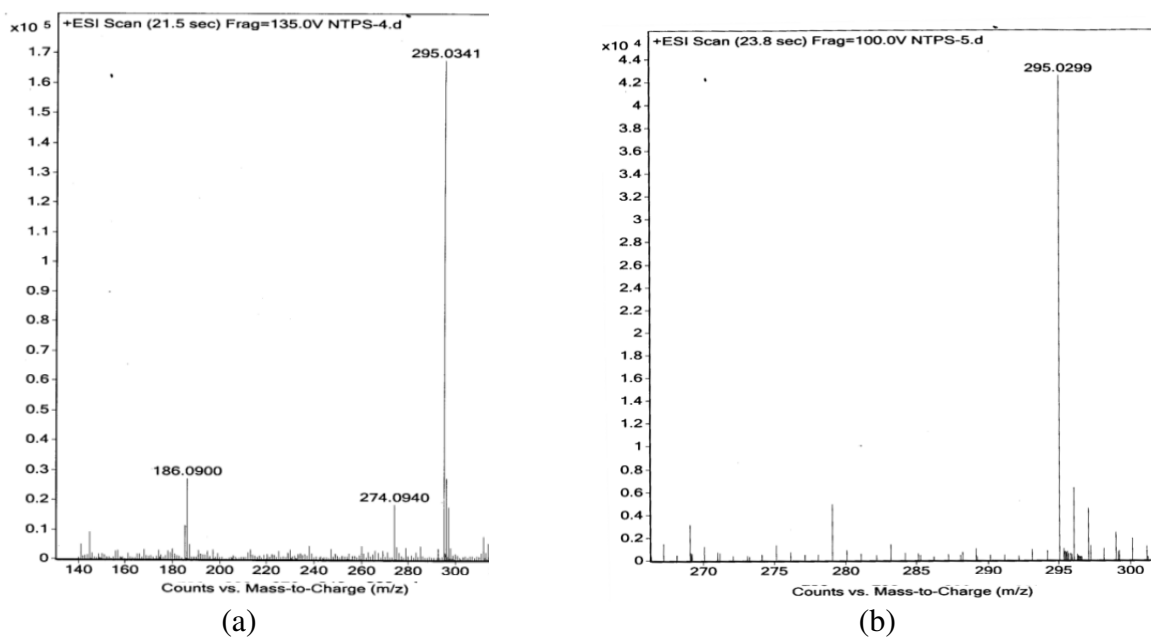

Figure S2: ESI mass spectra of (a)  $L^1$  and (b)  $L^2$

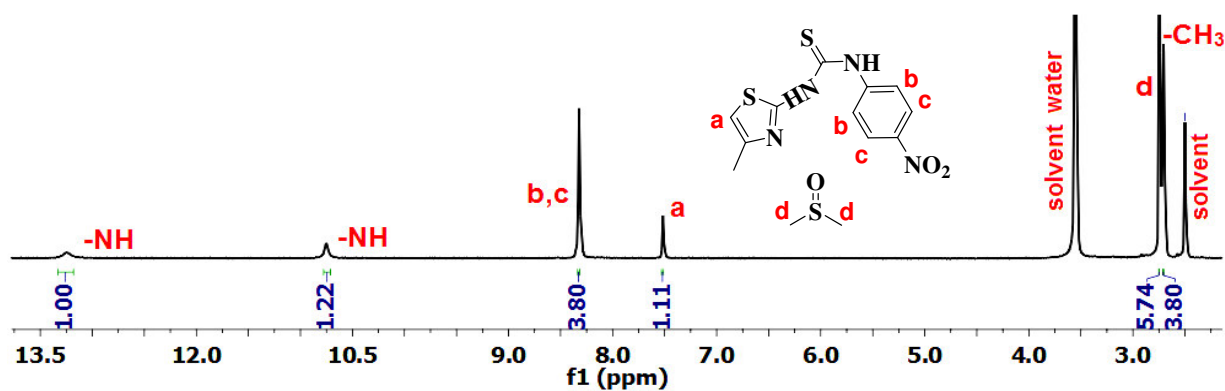

Figure S3:  $^1\text{H-NMR}$  spectrum (400 MHz,  $\text{DMSO-d}_6$ ) of DMSO solvate **1a**.

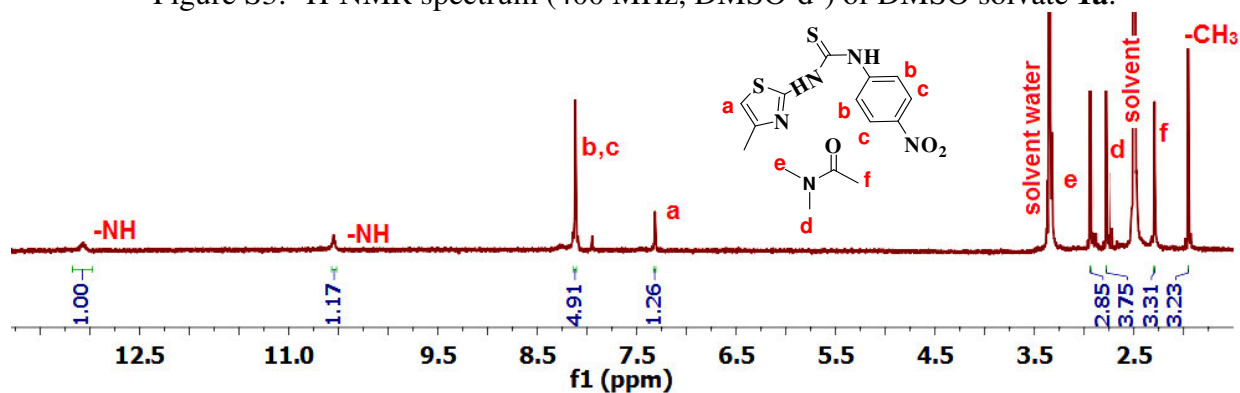

Figure S4:  $^1\text{H-NMR}$  spectra (400 MHz,  $\text{DMSO-d}_6$ ) of **2a**.

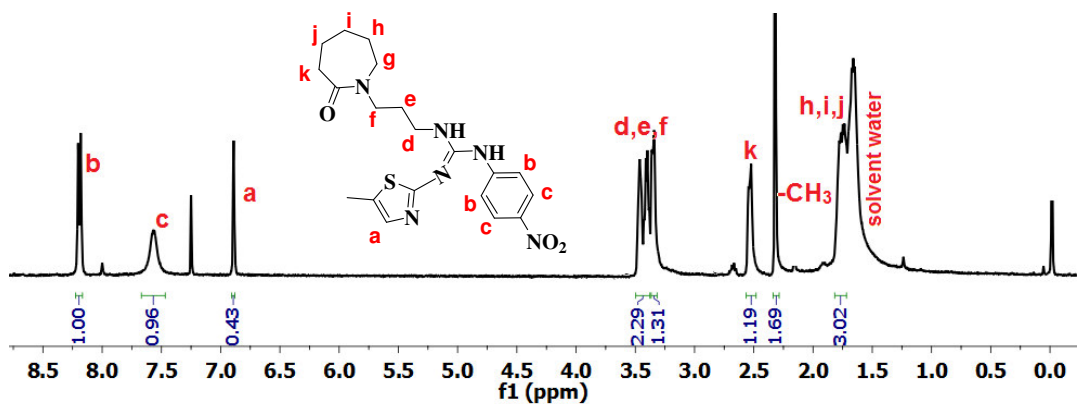

Figure S5:  $^1\text{H-NMR}$  spectra (400 MHz,  $\text{CDCl}_3$ ) of **3a**.

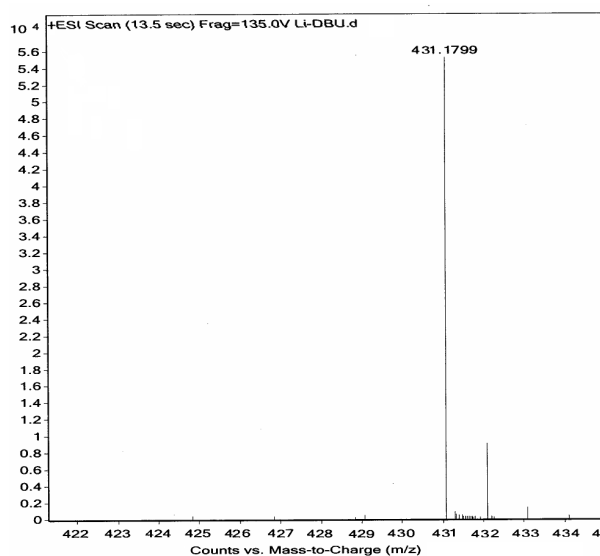

Figure S6: ESI mass spectra of **3a**.

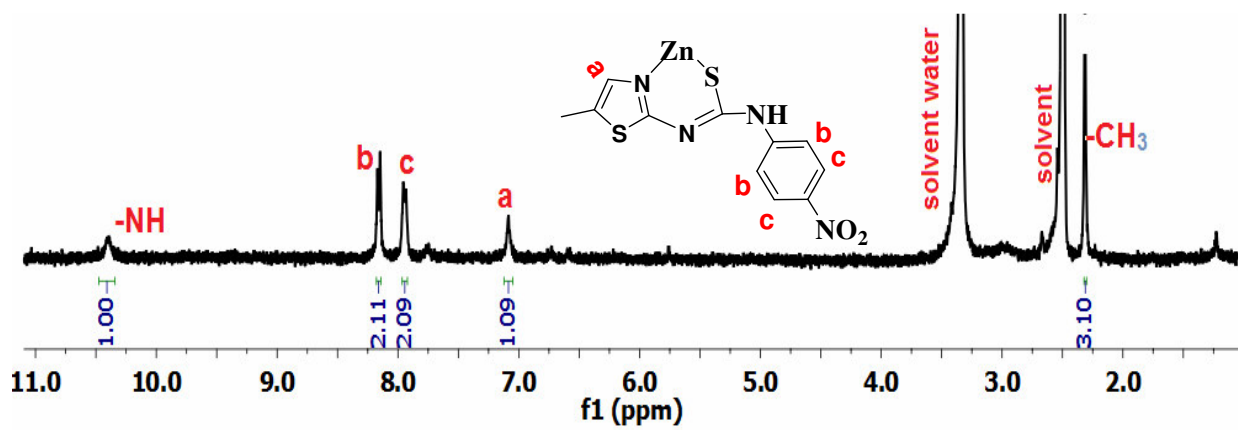

(a)

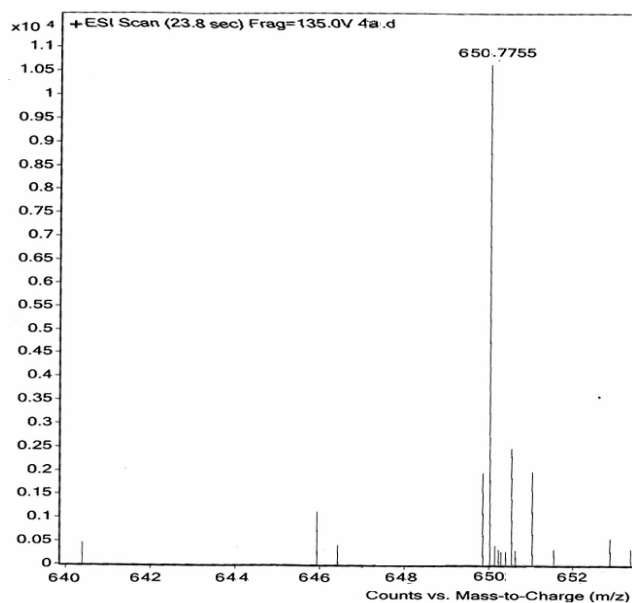

(b)

Figure S7: (a)  $^1\text{H-NMR}$  spectra (400 MHz,  $\text{DMSO-d}_6$ ) of complex **4**. (b) ESI mass spectrum of **4**.

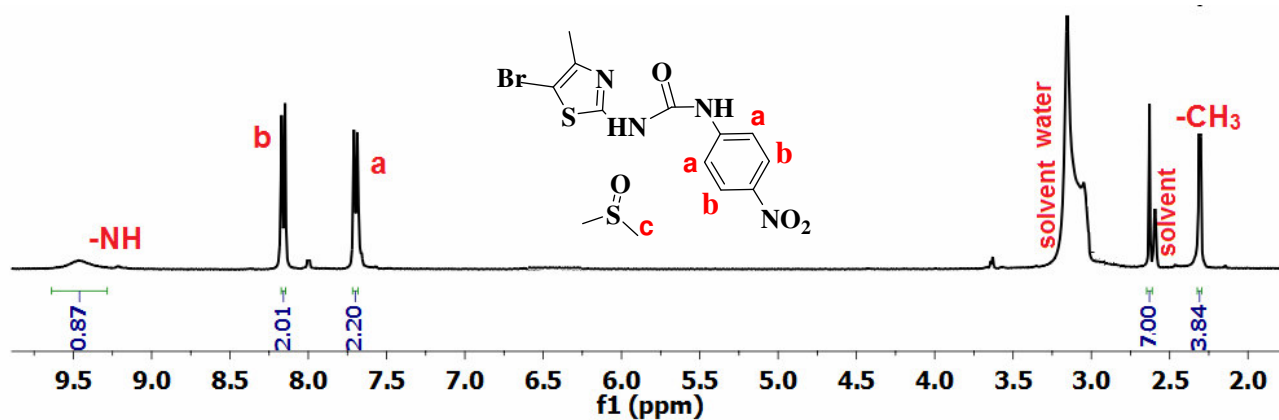

Figure S8:  $^1\text{H-NMR}$  spectra (400MHz,  $\text{DMSO-d}_6$ ) of **1b**.

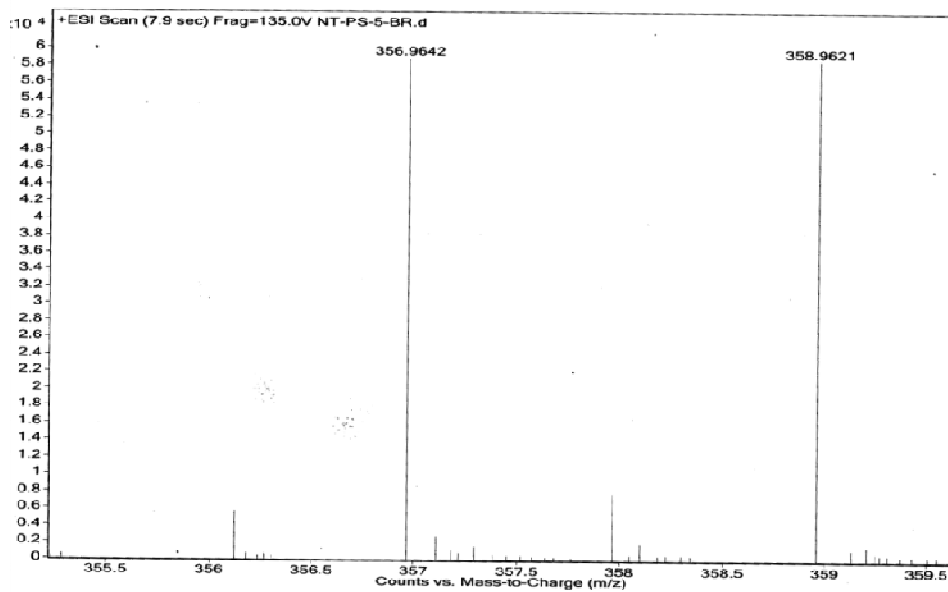

Figure S9: ESI mass spectra of **1b**.

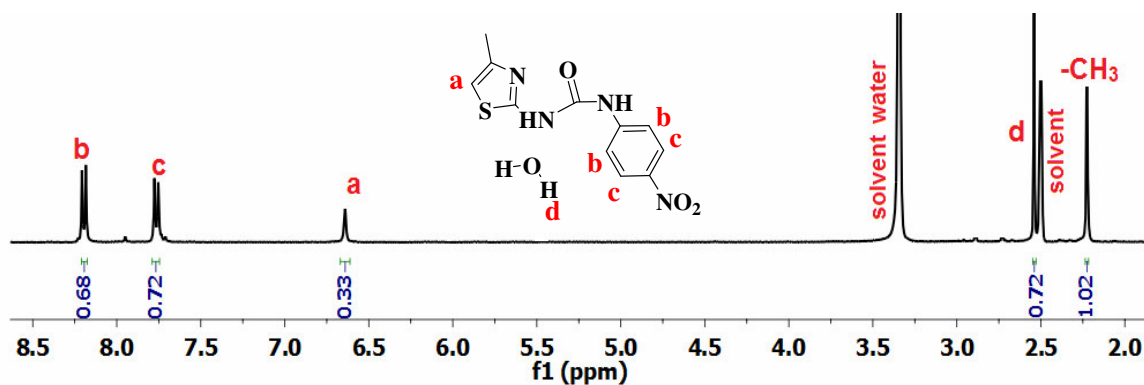

Figure S10: <sup>1</sup>H-NMR spectra (400MHz, DMSO-d<sub>6</sub>) of **2b**.

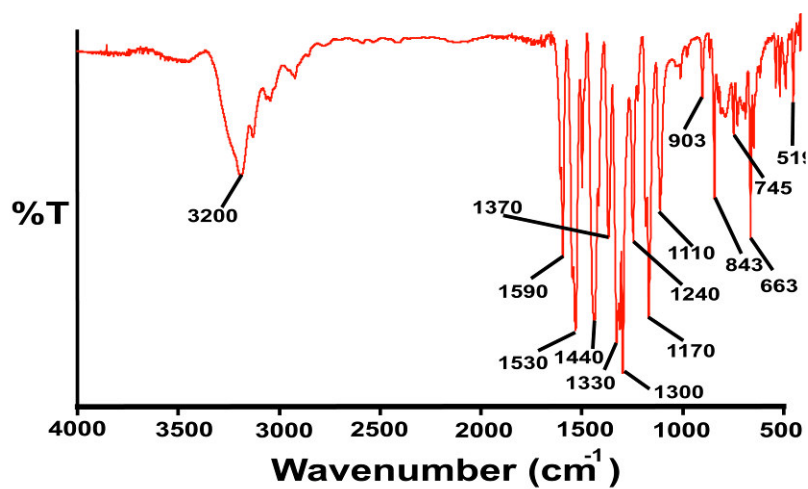

(a)

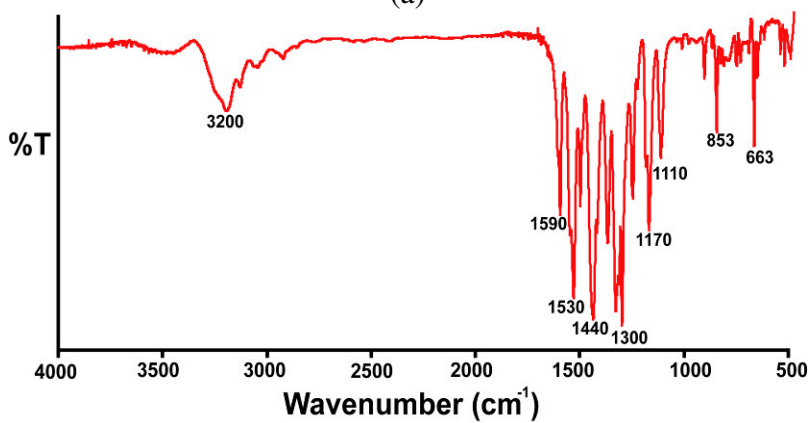

(b)

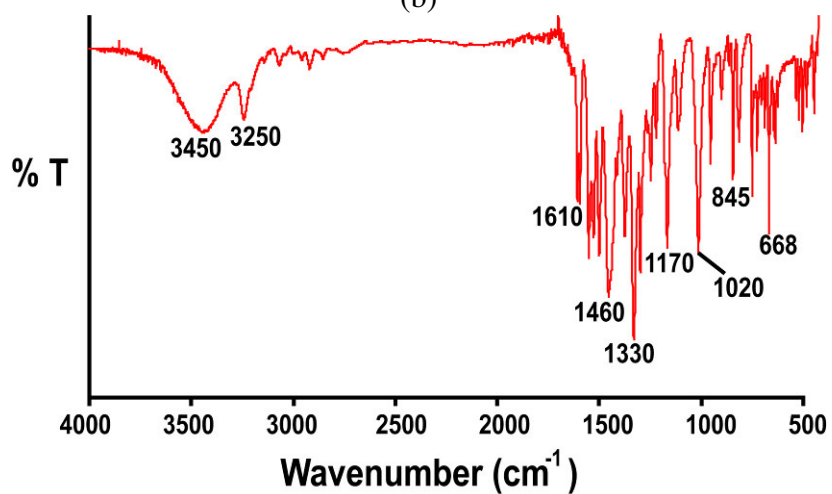

(c)

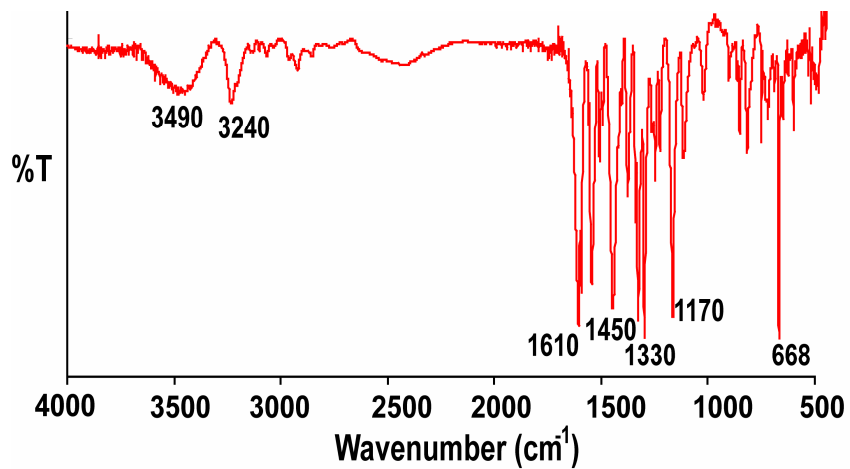

(d)

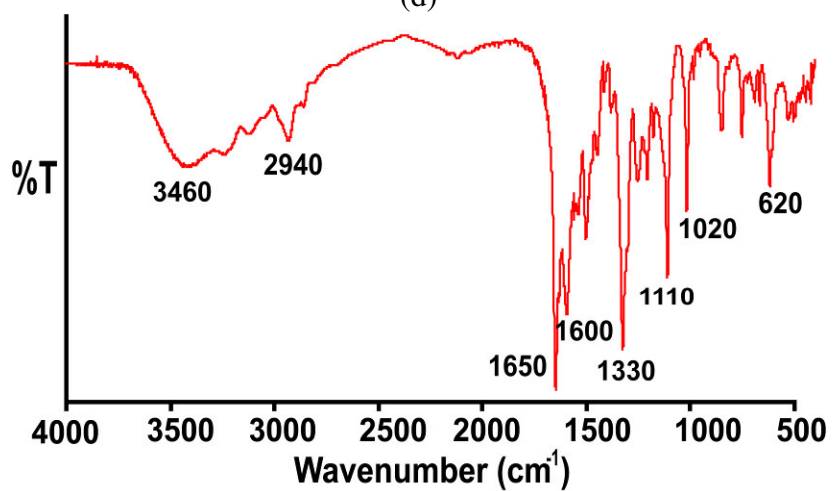

(e)

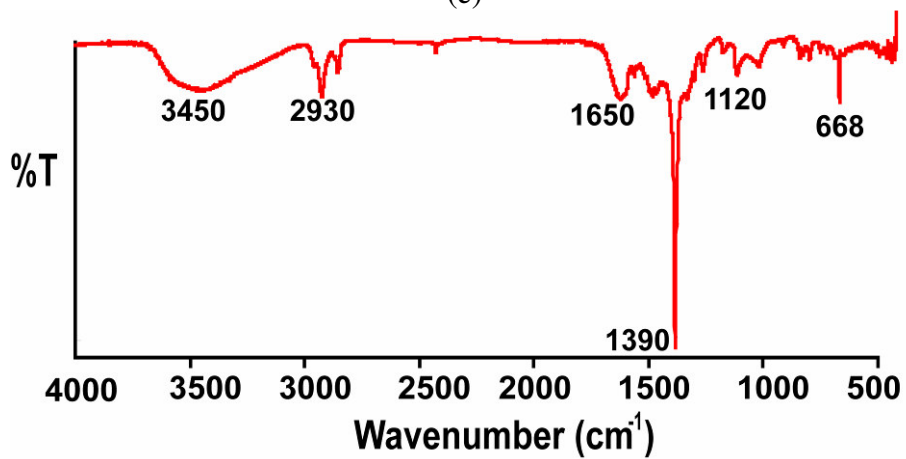

(f)

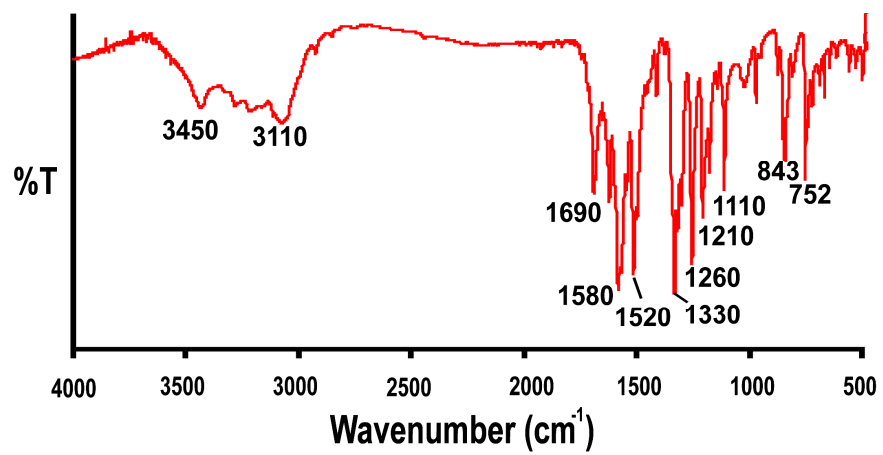

(g)

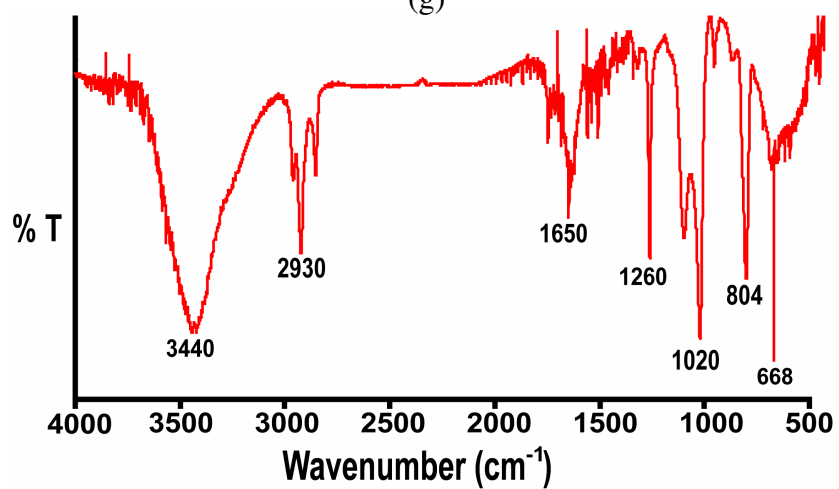

(h)

Figure S11: FT-IR spectra (KBr, cm<sup>-1</sup>) of (a) L<sup>1</sup>; (b) L<sup>2</sup> (c) 1a; (d) 2a; (e) 3a; (f) 4; (g) 1b; (h) 2b.



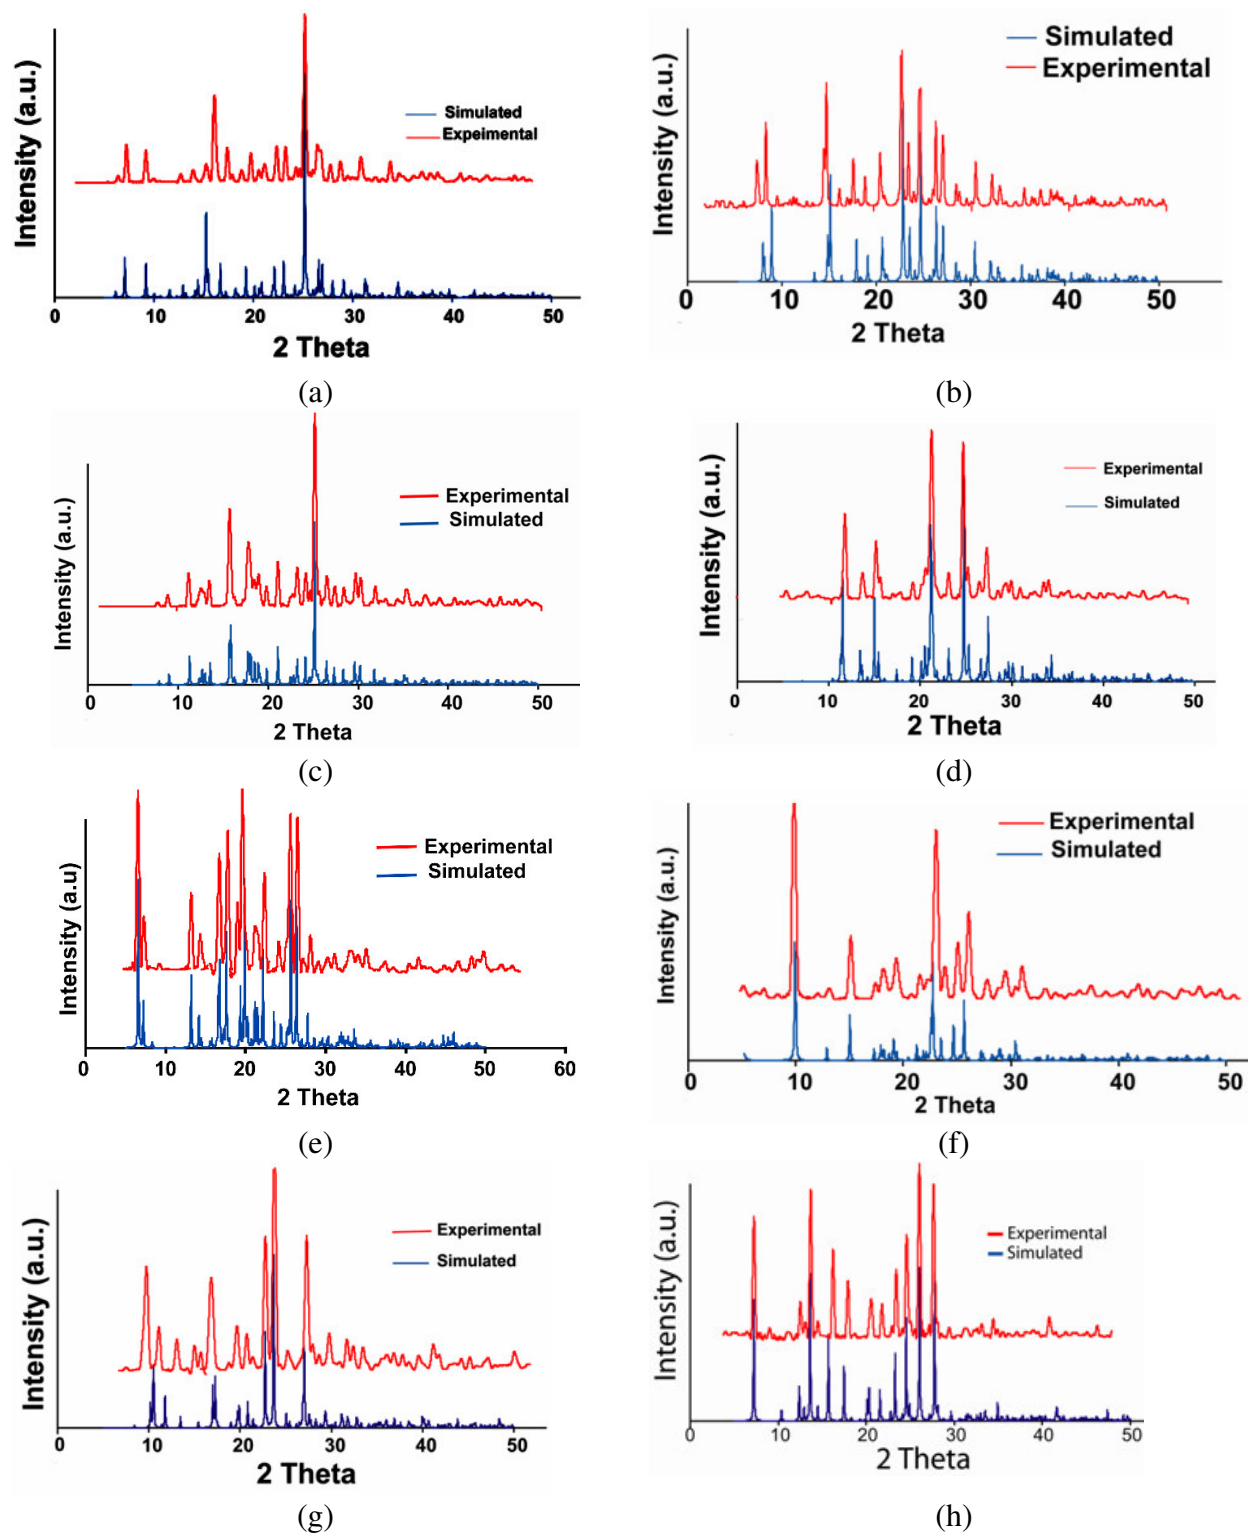

Figure S12: Powder XRD patterns of (a)  $L^1$  (b)  $L^2$  (c) **1a**; (d) **2a**; (e) **3a**; (f) **4** (g) **1b** (h) **2b**. (top one are experimental pattern and lower one are generated from crystallographic information files)

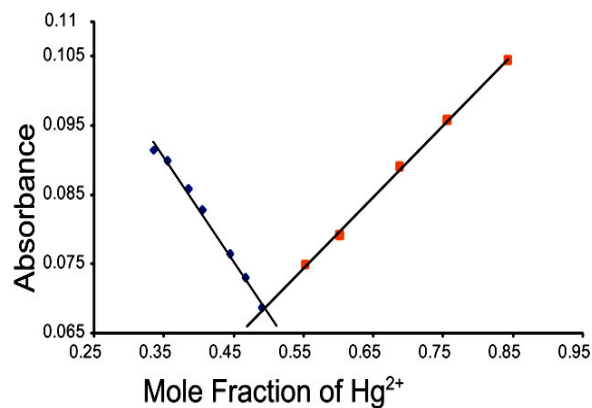

Figure S 13: Job plot for the determination of the stoichiometry of  $L^1$  and  $Hg^{2+}$  in the complex (absorbance at 355nm).

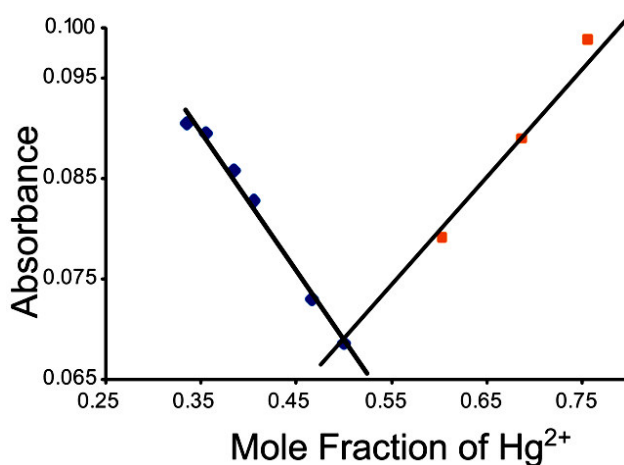

Figure S14: Job plot for the determination of the stoichiometry of  $L^2$  and  $Hg^{2+}$  in the complex (absorbance at 350 nm).

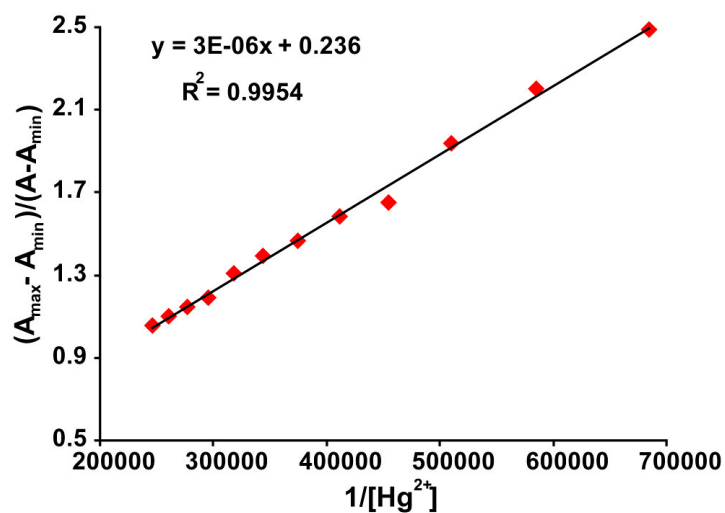

Figure S15: Benesi-Hildebrand plot of  $L^1$  for titration with  $Hg^{2+}$ .

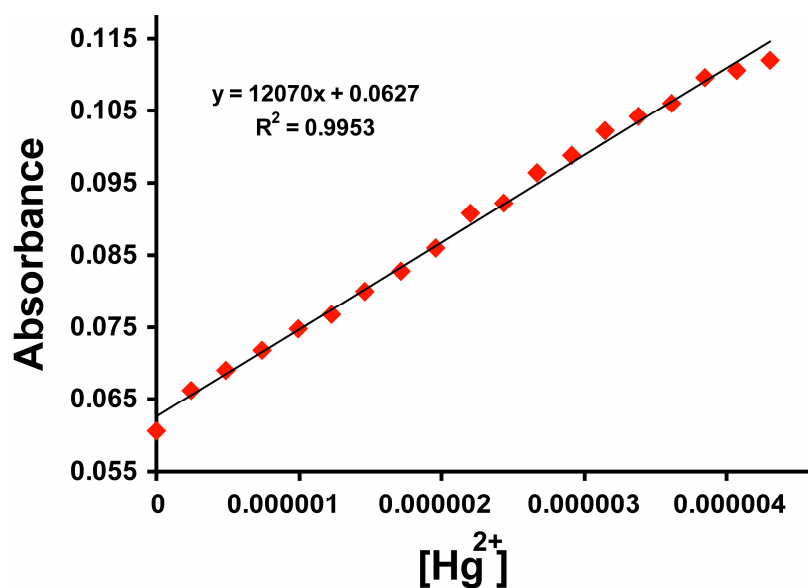

Figure S16: Absorbance versus concentration plot for measuring the detection limit ( $3\sigma/k$ ,  $\sigma = 0.0000753$ ) of  $Hg^{2+}$  by  $L^1$ .

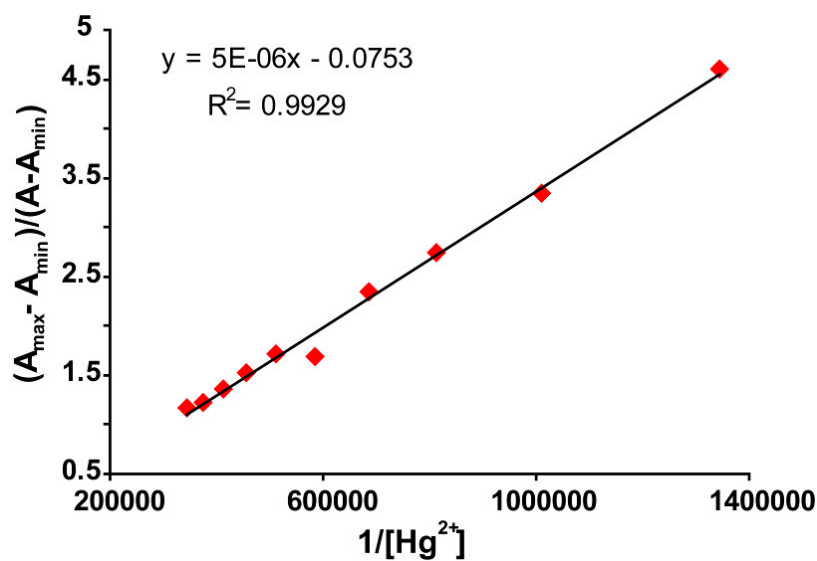

Figure S17: Benesi-Hildebrand plot of  $L^2$  for titration with  $Hg^{2+}$ .

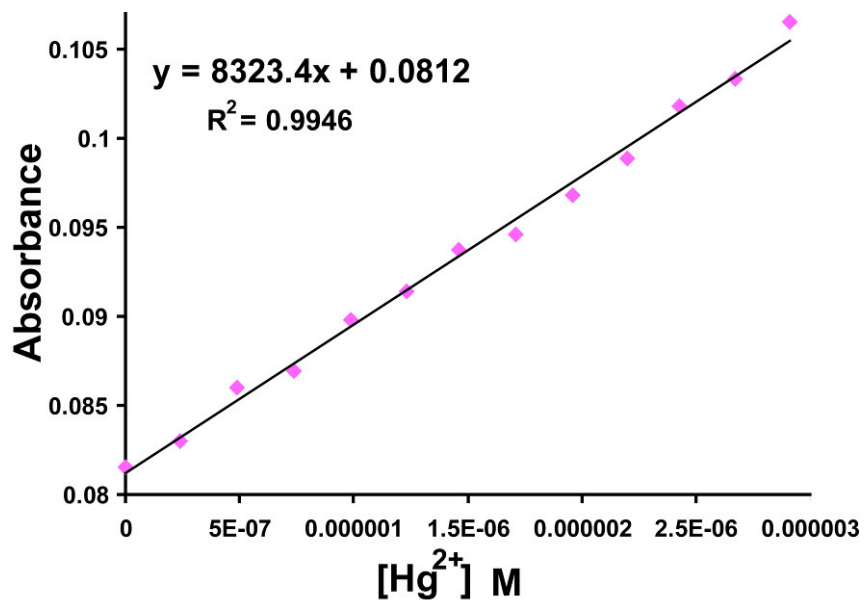

Figure S18: Absorbance versus concentration plot for measuring the detection limit ( $3\sigma/k$ ,  $\sigma = 0.000101222$ ) of  $Hg^{2+}$  by  $L^2$

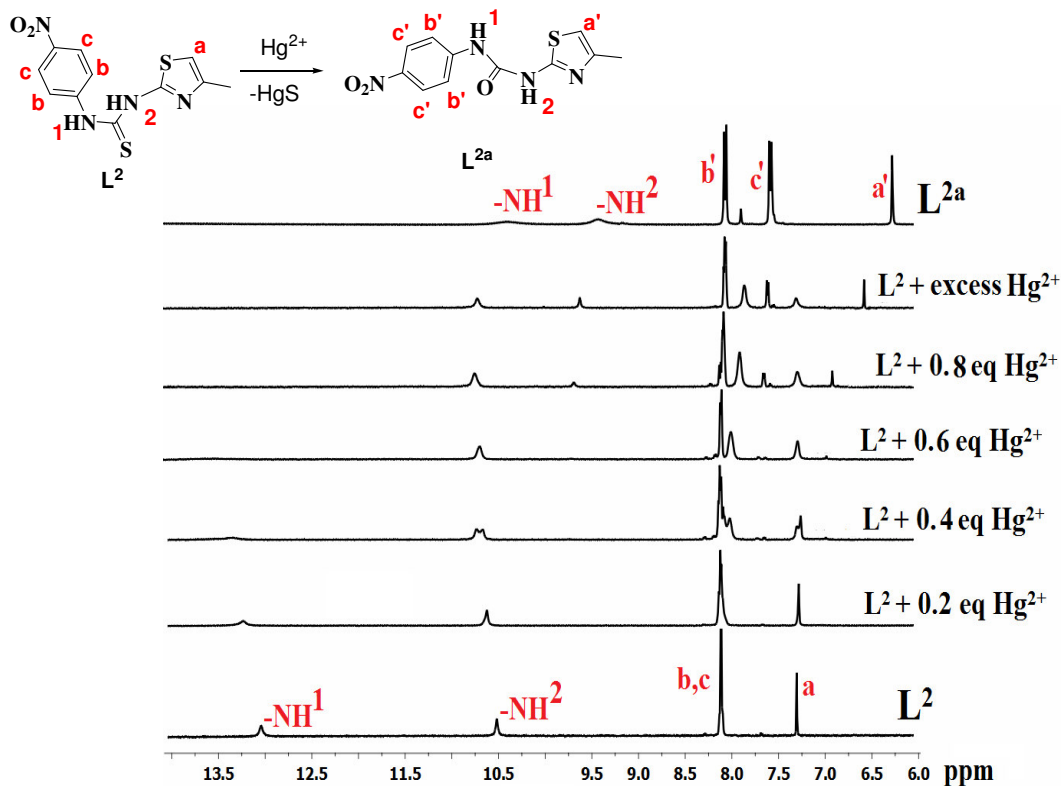

Figure S19:  $^1H$ -NMR (DMSO- $d_6$ , 600MHz) spectra (6-14 ppm region) of  $L^2$  during titration with  $Hg^{2+}$ .

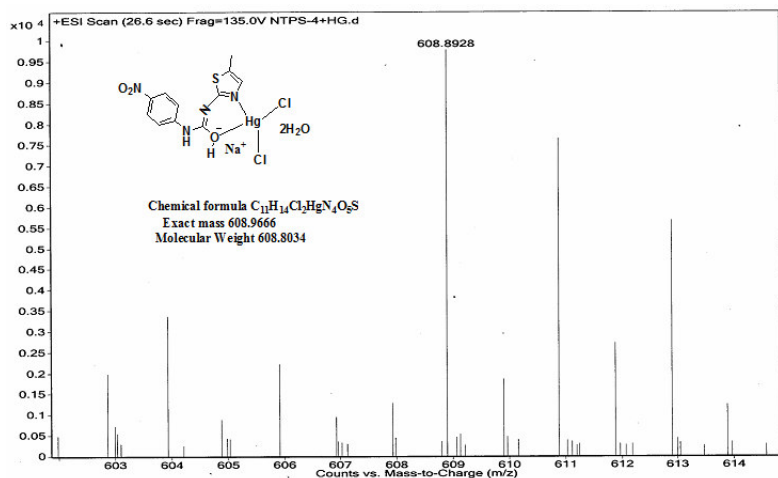

(a)

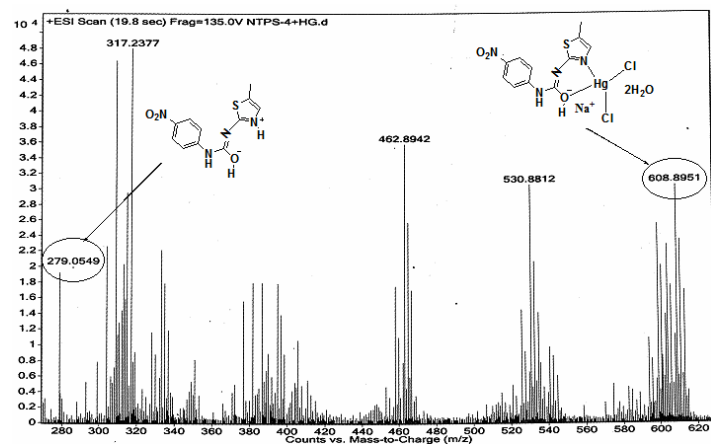

(b)

Figure S20: (a) and (b) are ESI-mass spectra showing two different mass regions of the 1:1 of  $L^1$  with mercuric chloride.

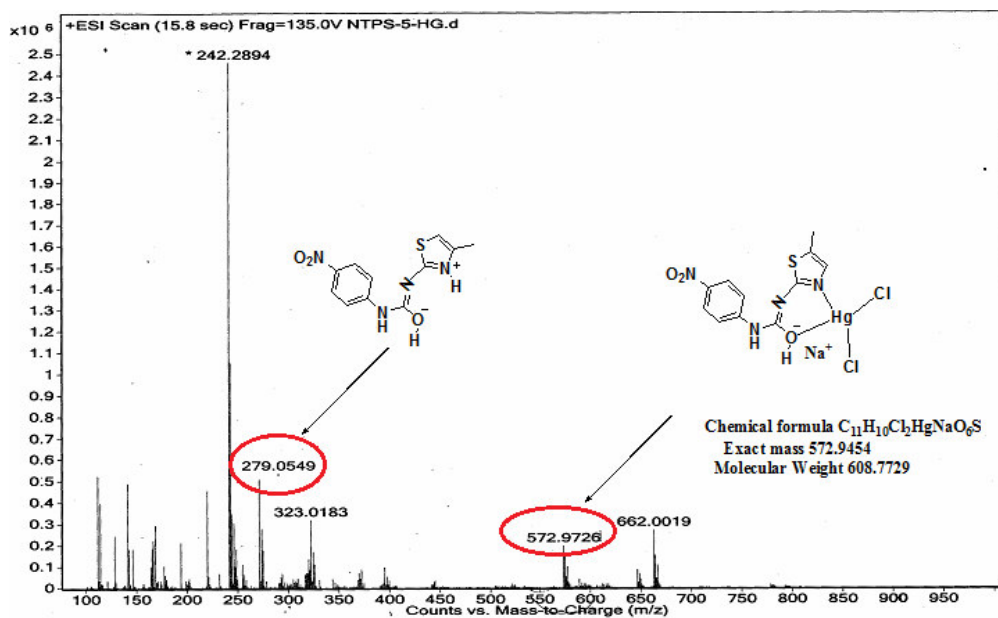

Figure S21. ESI-mass spectra of the urea derivative of  $L^2$  with  $HgCl_2$  showing 1:1 complex formation of urea derivative of  $L^2$  with  $Hg^{2+}$ .

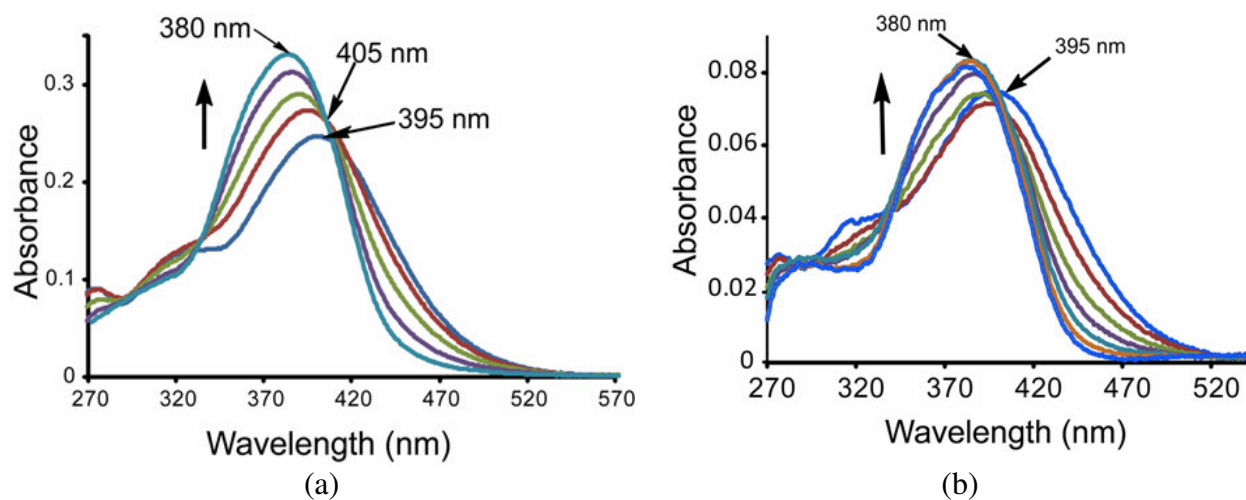

Figure S22: Absorption spectra of (a)  $L^1$  ( $3 \mu\text{M}$ ) (b)  $L^2$  ( $1 \mu\text{M}$ ) with  $\text{Al}^{3+}$  ( $1 \times 10^{-3} \text{ M}$ ) in dimethylformamide by adding  $5 \mu\text{l}$  in each aliquot.

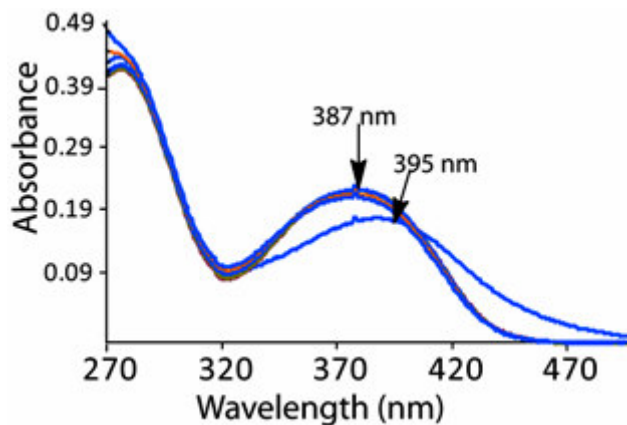

Figure S23: Absorption spectra of (a)  $L^1$  ( $1 \mu\text{M}$ ) with the addition of  $\text{Zn}^{2+}$  ( $1 \times 10^{-2} \text{ M}$ ) followed by  $\text{Hg}^{2+}$  ( $1 \times 10^{-2} \text{ M}$ )

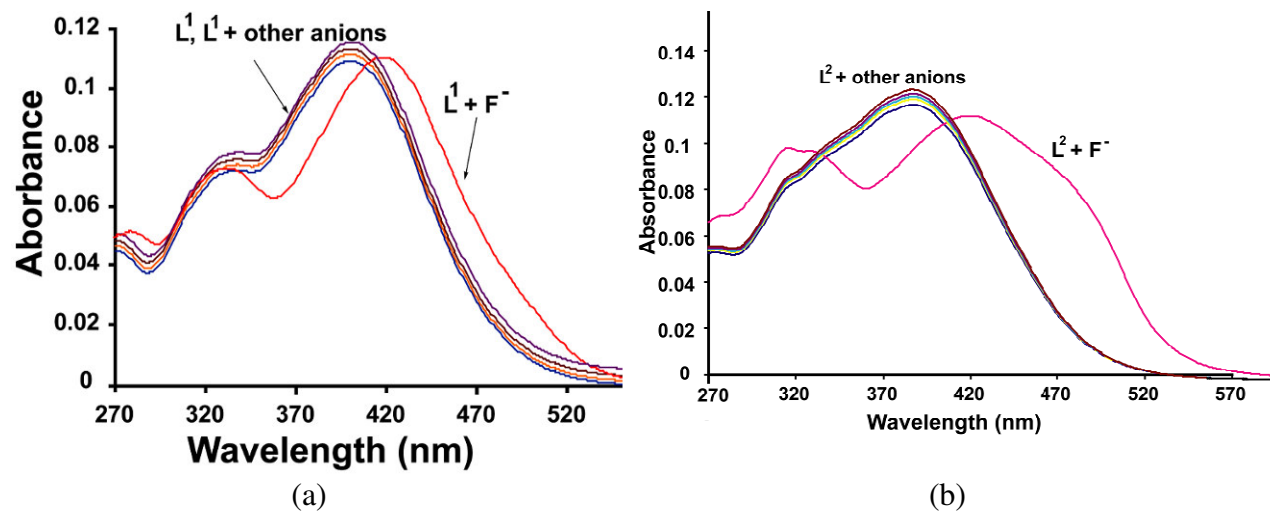

Figure S24 : UV-visible absorption spectra of (c)  $L^1$  (5  $\mu$ M) (d)  $L^2$  (7.5  $\mu$ M) in the presence of different anions such as  $F^-$ ,  $Br^-$ ,  $Cl^-$ ,  $I^-$ ,  $SO_4^{2-}$ ,  $HSO_4^-$ ,  $PF_6^-$ ,  $NO_3^-$ ,  $HPO_4^-$ ,  $H_2PO_4^-$ ,  $OAc^-$ ,  $ClO_4^-$  in DMF (Some lines overlap).

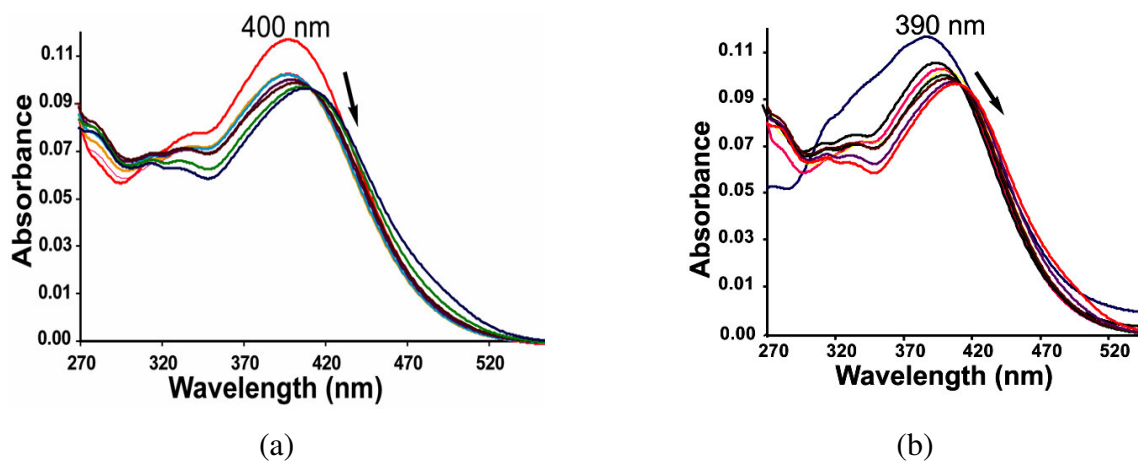

Figure S25: Absorption spectra of (a)  $L^1$  (1  $\mu$ M) (b)  $L^2$  (1  $\mu$ M) with TBAOH in DMF.

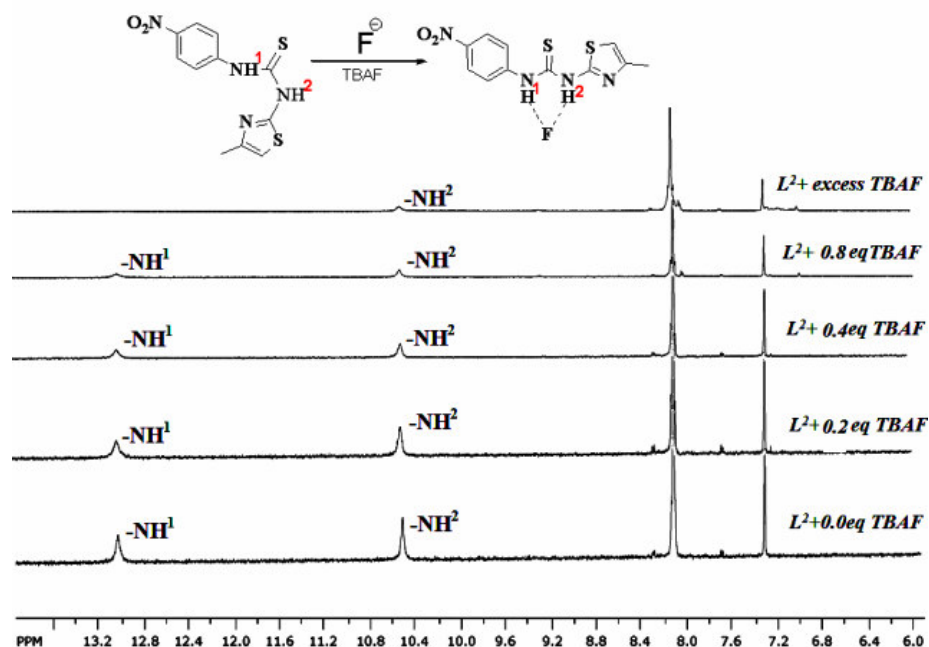

Figure S26:  $^1\text{H-NMR}$  ( $\text{DMSO-d}^6$ , 600MHz) spectra of aromatic region (6-14ppm) of  $\text{L}^2$  during titration with tetrabutylammonium fluoride (0.2, 0.4, 0.6 and 0.8 eq and excess TBAF)

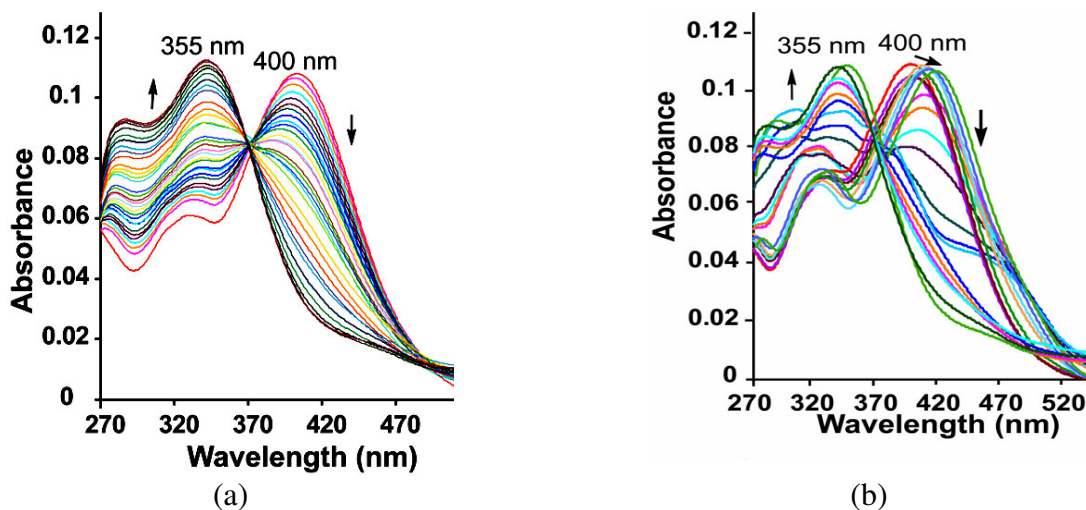

Figure S27 : Absorption spectra of (a)  $\text{L}^1$  ( $1\ \mu\text{M}$ ) on addition of  $\text{Hg}^{2+}$  ( $1\times 10^{-4}\ \text{M}$ ) followed by  $\text{F}^-$  ( $1\times 10^{-3}\ \text{M}$ ) (as TBAF); (b)  $\text{L}^1$  ( $1\ \mu\text{M}$ ) on addition of  $\text{F}^-$  ( $1\times 10^{-4}\ \text{M}$ ) (as TBAF) followed by  $\text{Hg}^{2+}$  ( $1\times 10^{-4}\ \text{M}$ ).



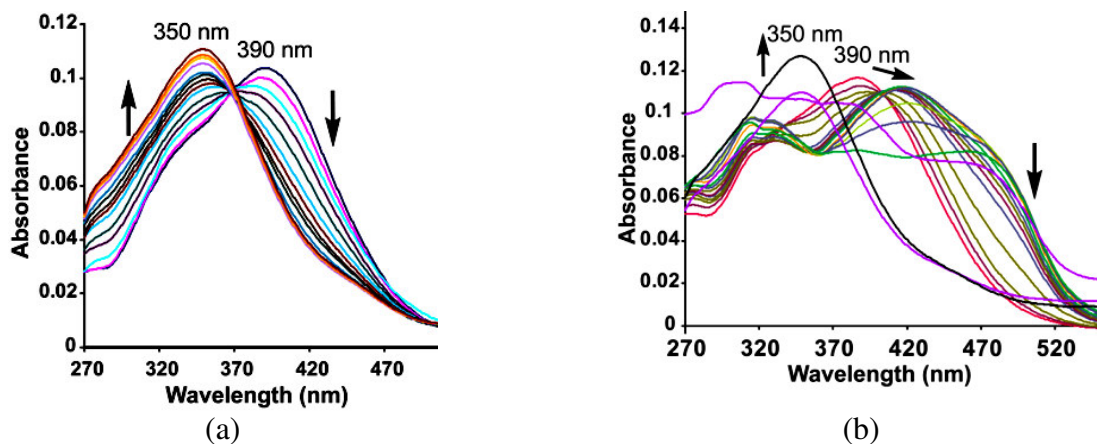

Figure S28: Absorption spectra of (a)  $L^2$  ( $1 \mu\text{M}$ ) on addition of  $\text{Hg}^{2+}$  ( $1 \times 10^{-3} \text{ M}$ ) followed by  $\text{F}^-$  ( $1 \times 10^{-2} \text{ M}$ ) (as TBAF); (b)  $L^2$  ( $1 \mu\text{M}$ ) on addition of  $\text{F}^-$  ( $1 \times 10^{-2} \text{ M}$ ) (as TBAF) followed by  $\text{Hg}^{2+}$  ( $1 \times 10^{-3} \text{ M}$ ).

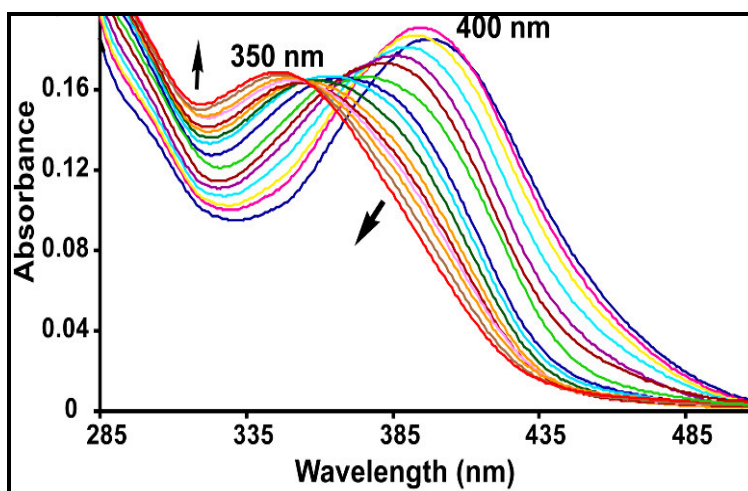

Figure S29 : UV-Visible titration spectra of  $L^1$  ( $6.0 \mu\text{M}$ ) in at different concentrations of  $\text{Hg}^{2+}$  (0.31, 0.62, 0.93, 1.2, 1.5, 1.86, 2.16, 2.47, 2.78, 3.08, 3.39, 3.69, 3.99, 4.29, and  $4.6 \mu\text{M}$  respectively) at room temperature in DMF/water (9 : 1, v/v) medium

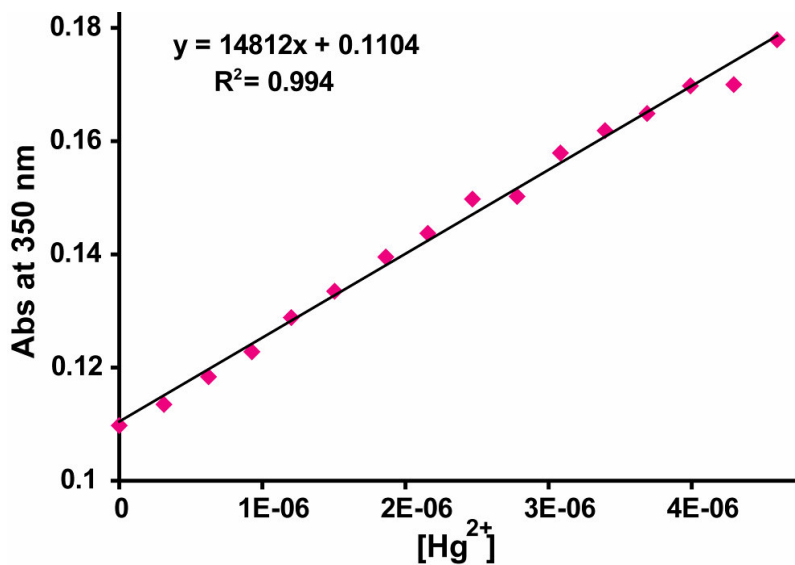

Figure S30: Absorbance versus concentration plot for measuring the detection limit of  $\text{Hg}^{2+}$  by  $\text{L}^1$ . ( $\sigma = 0.0000753$ ) Detection limit=3.06 ppb

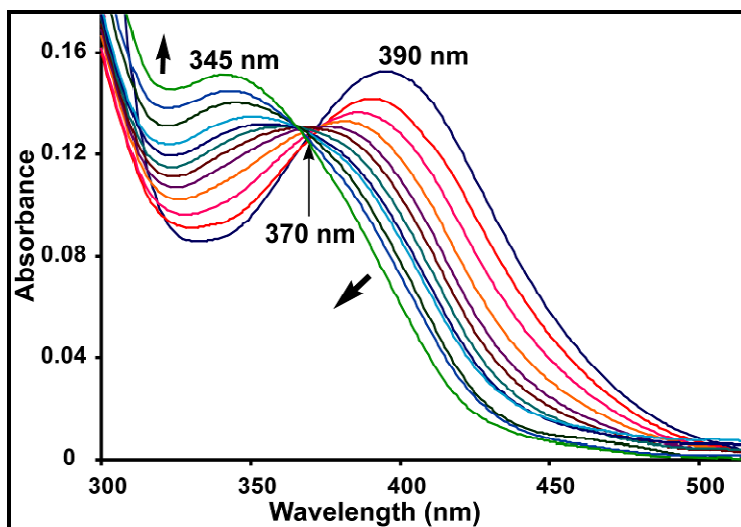

Figure S31 : UV-Visible titration spectra of  $\text{L}^2$  (7.5  $\mu\text{M}$ ) at different concentrations of  $\text{Hg}^{2+}$  (0.31, 0.62, 0.93, 1.2, 1.5, 1.86, 2.16, 2.47, 2.78, 3.08 and 3.39  $\mu\text{M}$  respectively) at room temperature in DMF/water (9 : 1, v/v).

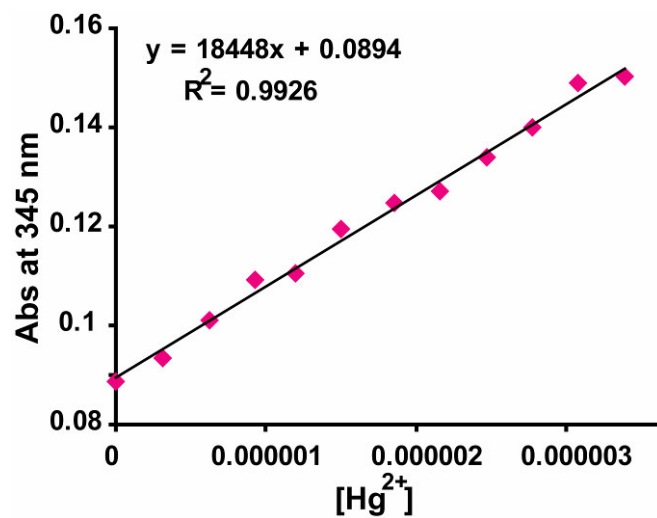

Figure S32: Absorbance versus concentration plot for measuring the detection limit of  $\text{Hg}^{2+}$  by  $\text{L}^2$ . ( $\sigma = 0.00012111$ ) Detection limit = 4.99 ppb

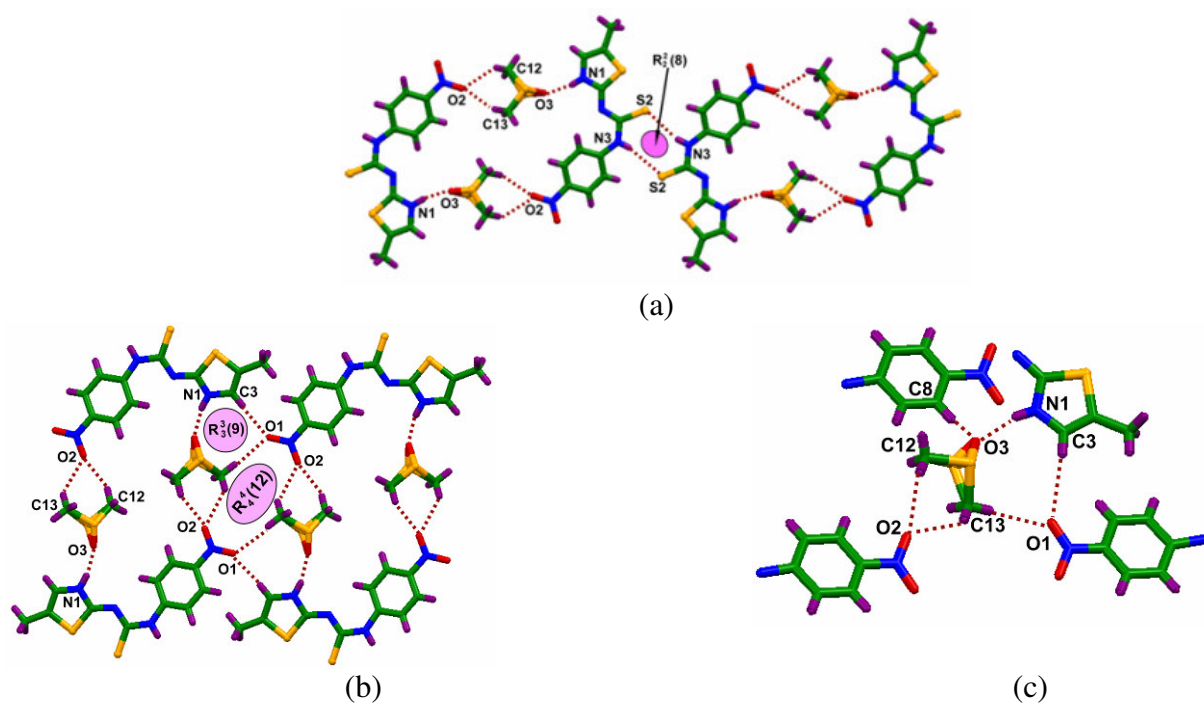

Figure S33: (a) Various H-bonded assemblies in the crystal lattice of **1a**. (b) Zig-zag arrangement of DMSO molecules in the layers of host molecules. (c) Surroundings of a DMA in **1a**.

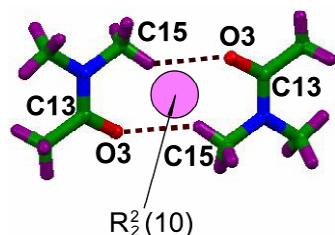

Figure S34: Self-assembly between DMA molecules in the crystal lattice of **2a**.

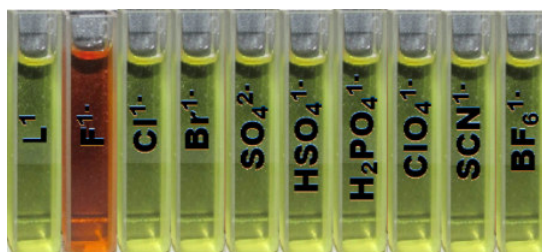

Figure S35 : Color change of  $L^1$  after addition of  $F^-$  and other anions.

Table S1: Crystallographic parameters of  $L^1$ ,  $L^2$ , **1a**, **2a**, **2.1a**, **3a**, **4**, **1b** and **2b**.

| Compound No.                                    | $L^1$                   | $L^2$                   | <b>1a</b>               | <b>2a</b>               |
|-------------------------------------------------|-------------------------|-------------------------|-------------------------|-------------------------|
| Formulae                                        | $C_{11}H_{10}N_4O_2S_2$ | $C_{11}H_{10}N_4O_2S_2$ | $C_{13}H_{16}N_4O_3S_3$ | $C_{15}H_{19}N_5O_3S_2$ |
| Mol. wt.                                        | 294.35                  | 294.35                  | 372.48                  | 381.47                  |
| Crystal system                                  | Triclinic               | Monoclinic              | Triclinic               | Triclinic               |
| Space group                                     | <i>P</i> -1             | <i>C</i> 2/ <i>c</i>    | <i>P</i> -1             | <i>P</i> -1             |
| Temperature (K)                                 | 296(2)                  | 296(2)                  | 296(2)                  | 296(2)                  |
| Wavelength (Å)                                  | 0.71073                 | 0.71073                 | 0.71073                 | 0.71073                 |
| <i>a</i> (Å)                                    | 10.6976(8)              | 24.0180(18)             | 7.8556(4)               | 8.5882(6)               |
| <i>b</i> (Å)                                    | 12.5934(9)              | 4.9616(2)               | 10.5492(5)              | 9.0566(7)               |
| <i>c</i> (Å)                                    | 14.4096(9)              | 23.5481(18)             | 11.5009(6)              | 13.2569(9)              |
| $\alpha$ (°)                                    | 87.490(5)               | 90.00                   | 91.605(3)               | 93.909(4)               |
| $\beta$ (°)                                     | 85.965(5)               | 112.834(9)              | 102.511(3)              | 107.379(4)              |
| $\gamma$ (°)                                    | 83.479(5)               | 90.00                   | 110.839(2)              | 107.982(4)              |
| <i>V</i> (Å <sup>3</sup> )                      | 1922.7(2)               | 2586.3(3)               | 863.80(8)               | 921.26(11)              |
| <i>Z</i>                                        | 6                       | 8                       | 2                       | 2                       |
| Density/Mgm <sup>-3</sup>                       | 1.525                   | 1.512                   | 1.432                   | 1.375                   |
| Abs. Coeff. /mm <sup>-1</sup>                   | 0.418                   | 0.415                   | 0.447                   | 0.313                   |
| Abs. correction                                 | multi-scan              | multi-scan              | multi-scan              | multi-scan              |
| F(000)                                          | 912                     | 1216                    | 388                     | 400                     |
| Total reflections                               | 6199                    | 2324                    | 3058                    | 3152                    |
| Reflections, <i>I</i> > 2 $\sigma$ ( <i>I</i> ) | 3099                    | 1834                    | 2624                    | 2348                    |
| Max. $\theta$ /°                                | 25.00                   | 25.25                   | 97.6                    | 25.00                   |

|                               |                                                                              |                                                                 |                                                                                        |                                                                                |
|-------------------------------|------------------------------------------------------------------------------|-----------------------------------------------------------------|----------------------------------------------------------------------------------------|--------------------------------------------------------------------------------|
| Ranges (h, k, l)              | -8 ≤ h ≤ 11<br>-14 ≤ k ≤ 14<br>-17 ≤ l ≤ 16                                  | -28 ≤ h ≤ 27<br>-5 ≤ k ≤ 5<br>-28 ≤ l ≤ 17                      | -9 ≤ h ≤ 9<br>-12 ≤ k ≤ 12<br>-13 ≤ l ≤ 13                                             | -10 ≤ h ≤ 10<br>-9 ≤ k ≤ 10<br>-15 ≤ l ≤ 15                                    |
| Complete to 2θ (%)            | 97.5                                                                         | 99.8                                                            | 97.6                                                                                   | 97.3                                                                           |
| Data/restrain/<br>parameter   | 6599/0/525                                                                   | 2324/0/181                                                      | 3058/0/250                                                                             | 3152/0/234                                                                     |
| Goof(F <sup>2</sup> )         | 1.003                                                                        | 0.999                                                           | 1.037                                                                                  | 1.036                                                                          |
| R indices [I > 2σ(I)]         | 0.0577                                                                       | 0.0415                                                          | 0.0339                                                                                 | 0.0398                                                                         |
| R indices (all data)          | 0.1077                                                                       | 0.0572                                                          | 0.0393                                                                                 | 0.0590                                                                         |
| Compound No.                  | <b>2.1a</b>                                                                  | <b>3a</b>                                                       | <b>4</b>                                                                               | <b>1b</b>                                                                      |
| Formulae                      | C <sub>15</sub> H <sub>19</sub> N <sub>5</sub> O <sub>3</sub> S <sub>2</sub> | C <sub>20</sub> H <sub>26</sub> N <sub>6</sub> O <sub>3</sub> S | C <sub>27.60</sub> H <sub>31.60</sub> N <sub>10</sub> O <sub>6</sub> S <sub>4</sub> Zn | C <sub>13</sub> H <sub>15</sub> BrN <sub>4</sub> O <sub>4</sub> S <sub>2</sub> |
| Mol. wt.                      | 381.47                                                                       | 430.53                                                          | 793.06                                                                                 | 435.31                                                                         |
| Crystal system                | Triclinic                                                                    | Monoclinic                                                      | Monoclinic                                                                             | Triclinic                                                                      |
| Space group                   | <i>P</i> -1                                                                  | <i>P</i> 2 <sub>1</sub> / <i>n</i>                              | <i>C</i> 2/ <i>c</i>                                                                   | <i>P</i> -1                                                                    |
| Temperature (K)               | 296(2)                                                                       | 296(2)                                                          | 296(2)                                                                                 | 296(2)                                                                         |
| Wavelength (Å)                | 0.71073                                                                      | 0.71073                                                         | 0.71073                                                                                | 0.71073                                                                        |
| <i>a</i> (Å)                  | 8.6923(2)                                                                    | 12.7147(16)                                                     | 35.437(2)                                                                              | 9.2653(7)                                                                      |
| <i>b</i> (Å)                  | 9.6622(2)                                                                    | 6.2855(9)                                                       | 5.1812(3)                                                                              | 10.2683(7)                                                                     |
| <i>c</i> (Å)                  | 11.9422(3)                                                                   | 27.243(3)                                                       | 19.7021(10)                                                                            | 11.4407(8)                                                                     |
| α (°)                         | 106.3890(10)                                                                 | 90.00                                                           | 90.00                                                                                  | 66.570(4)                                                                      |
| β (°)                         | 91.6680(10)                                                                  | 100.679(9)                                                      | 94.827(5)                                                                              | 80.387(5)                                                                      |
| γ (°)                         | 107.4030(10)                                                                 | 90.00                                                           | 90.00                                                                                  | 65.245(5)                                                                      |
| V (Å <sup>3</sup> )           | 911.10(4)                                                                    | 2139.5(5)                                                       | 3604.7(4)                                                                              | 906.93(11)                                                                     |
| Z                             | 2                                                                            | 4                                                               | 4                                                                                      | 2                                                                              |
| Density/Mgm <sup>-3</sup>     | 1.390                                                                        | 1.337                                                           | 1.461                                                                                  | 1.594                                                                          |
| Abs. Coeff. /mm <sup>-1</sup> | 0.317                                                                        | 0.186                                                           | 0.967                                                                                  | 2.521                                                                          |
| Abs. Correction               | multi-scan                                                                   | multi-scan                                                      | multi-scan                                                                             | multi-scan                                                                     |
| F(000)                        | 400                                                                          | 912                                                             | 1636.8                                                                                 | 440                                                                            |
| Total reflections             | 3258                                                                         | 3862                                                            | 3271                                                                                   | 3255                                                                           |
| Reflections, I > 2σ(I)        | 2775                                                                         | 1513                                                            | 2266                                                                                   | 1699                                                                           |
| Max. θ/°                      | 98.5                                                                         | 25.25                                                           | 25.25                                                                                  | 25.25                                                                          |
| Ranges (h, k, l)              | -10 ≤ h ≤ 10<br>-11 ≤ k ≤ 11<br>-14 ≤ l ≤ 14                                 | -15 ≤ h ≤ 14<br>-7 ≤ k ≤ 7<br>-32 ≤ l ≤ 32                      | -42 ≤ h ≤ 42<br>-6 ≤ k ≤ 4<br>-23 ≤ l ≤ 12                                             | -11 ≤ h ≤ 11<br>-12 ≤ k ≤ 11<br>-13 ≤ l ≤ 13                                   |
| Complete to 2θ (%)            | 98.5                                                                         | 99.4                                                            | 99.8                                                                                   | 99.1                                                                           |
| Data/restrain/<br>parameter   | 3258/0/289                                                                   | 3862/0/280                                                      | 3271/0/225                                                                             | 3255 /6/208                                                                    |
| Goof(F <sup>2</sup> )         | 1.005                                                                        | 0.817                                                           | 1.034                                                                                  | 1.004                                                                          |
| R indices [I > 2σ(I)]         | 0.0384                                                                       | 0.0509                                                          | 0.0571                                                                                 | 0.0516                                                                         |
| R indices (all data)          | 0.0444                                                                       | 0.1320                                                          | 0.0844                                                                                 | 0.1286                                                                         |
| Compound No.                  | <b>2b</b>                                                                    |                                                                 |                                                                                        |                                                                                |
| Formulae                      | C <sub>11</sub> H <sub>12</sub> N <sub>4</sub> O <sub>4</sub> S              |                                                                 |                                                                                        |                                                                                |
| Mol. wt.                      | 296.31                                                                       |                                                                 |                                                                                        |                                                                                |
| Crystal system                | triclinic                                                                    |                                                                 |                                                                                        |                                                                                |
| Space group                   | <i>P</i> -1                                                                  |                                                                 |                                                                                        |                                                                                |
| Temperature (K)               | 296(2)                                                                       |                                                                 |                                                                                        |                                                                                |
| Wavelength (Å)                | 0.71073                                                                      |                                                                 |                                                                                        |                                                                                |
| <i>a</i> (Å)                  | 6.557(2)                                                                     |                                                                 |                                                                                        |                                                                                |
| <i>b</i> (Å)                  | 8.595(2)                                                                     |                                                                 |                                                                                        |                                                                                |
| <i>c</i> (Å)                  | 12.225(3)                                                                    |                                                                 |                                                                                        |                                                                                |
| α (°)                         | 92.35(2)                                                                     |                                                                 |                                                                                        |                                                                                |
| β (°)                         | 91.90(2)                                                                     |                                                                 |                                                                                        |                                                                                |
| γ (°)                         | 98.16(2)                                                                     |                                                                 |                                                                                        |                                                                                |
| V (Å <sup>3</sup> )           | 680.9(3)                                                                     |                                                                 |                                                                                        |                                                                                |
| Z                             | 2                                                                            |                                                                 |                                                                                        |                                                                                |
| Density/Mgm <sup>-3</sup>     | 1.445                                                                        |                                                                 |                                                                                        |                                                                                |
| Abs. Coeff. /mm <sup>-1</sup> | 0.257                                                                        |                                                                 |                                                                                        |                                                                                |
| Abs. Correction               | multi-scan                                                                   |                                                                 |                                                                                        |                                                                                |

|                                |                                                                          |
|--------------------------------|--------------------------------------------------------------------------|
| F(000)                         | 308                                                                      |
| Total reflections              | 2399                                                                     |
| Reflections, $I > 2\sigma(I)$  | 1122                                                                     |
| Max. $\theta/^\circ$           | 25.25                                                                    |
| Ranges (h, k, l)               | -15 $\leq$ h $\leq$ 17<br>-8 $\leq$ k $\leq$ 8<br>-24 $\leq$ l $\leq$ 38 |
| Complete to $2\theta$ (%)      | 97.3                                                                     |
| Data/restrain/parameter        | 2399/8/190                                                               |
| Goof( $F^2$ )                  | 1.097                                                                    |
| R indices [ $I > 2\sigma(I)$ ] | 0.1164                                                                   |
| R indices (all data)           | 0.2901                                                                   |

Table S2: Hydrogen bonds parameters of **L<sup>1</sup>**, **L<sup>2</sup>**, **1a**, **2a**, **2.1.a**, **3a**, **4**, **1b** and **2b**.

| Compd No.                                  |                                          | $d_{D-H}(\text{\AA})$                | $d_{H-A}(\text{\AA})$ | $d_{D-A}(\text{\AA})$ | $\angle D-H\cdots A$ ( $^\circ$ ) |
|--------------------------------------------|------------------------------------------|--------------------------------------|-----------------------|-----------------------|-----------------------------------|
| <b>L<sup>1</sup></b>                       | N(1)-H(1) $\cdots$ O(4)                  | 0.86                                 | 2.05                  | 2.880(4)              | 163                               |
|                                            | N(3)-H(4A) $\cdots$ S(4) [x,y,1+z]       | 0.86                                 | 2.74                  | 3.567(4)              | 161                               |
|                                            | N(5)-H(5A) $\cdots$ O(1)                 | 0.95(4)                              | 1.94(4)               | 2.876(5)              | 168(4)                            |
|                                            | N(7)-H(7A) $\cdots$ S(2) [x,y,-1+z]      | 0.86                                 | 2.75                  | 3.596(4)              | 167                               |
|                                            | N(9)-H(9A) $\cdots$ O(6) [-x,1-y,1-z]    | 0.82(4)                              | 2.09(4)               | 2.898(5)              | 169(4)                            |
|                                            | N(11)-H(11A) $\cdots$ S(6) [-x,1-y,-z]   | 0.86                                 | 2.74                  | 3.576(4)              | 166                               |
|                                            | C(7)-H(7) $\cdots$ S(4) [x,y,1+z]        | 0.93                                 | 2.84                  | 3.646(4)              | 146                               |
|                                            | C(11)-H(11) $\cdots$ N(2)                | 0.93                                 | 2.27                  | 2.849(6)              | 120                               |
|                                            | C(18)-H(18) $\cdots$ N(6)                | 0.93                                 | 2.37                  | 2.892(5)              | 115                               |
|                                            | C(29)-H(29) $\cdots$ N(10)               | 0.93                                 | 2.32                  | 2.861(5)              | 117                               |
|                                            | <b>L<sup>2</sup></b>                     | N(1)-H(1) $\cdots$ O(1) [-x,1-y,-z]  | 0.72(3)               | 2.23(3)               | 2.946(3)                          |
| N(3)-H(3A) $\cdots$ S(2) [1/2-x,-1/2-y,-z] |                                          | 0.80(3)                              | 2.76(3)               | 3.496(3)              | 154(3)                            |
| C(11)-H(11) $\cdots$ N(2)                  |                                          | 0.93                                 | 2.34                  | 2.874(4)              | 116                               |
| <b>1a</b>                                  | N(1)-H(1) $\cdots$ O(3)                  | 0.86(2)                              | 1.87(2)               | 2.711(3)              | 165(2)                            |
|                                            | N(3)-H(3A) $\cdots$ S(2) [-x,-y,1-z]     | 0.79(2)                              | 2.76(2)               | 3.5255(19)            | 163.7(19)                         |
|                                            | C(8)-H(8) $\cdots$ O(3) [1-x,1-y,1-z]    | 0.93                                 | 2.50                  | 3.211(4)              | 133                               |
|                                            | C(11)-H(11) $\cdots$ N(2)                | 0.93                                 | 2.34                  | 2.901(2)              | 118                               |
|                                            | C(12)-H(12A) $\cdots$ O(2) [1-x,2-y,1-z] | 1.04(4)                              | 2.54(4)               | 3.318(4)              | 131(3)                            |
|                                            | C(13)-H(13A) $\cdots$ O(1) [-1+x,y,-1+z] | 0.98(4)                              | 2.58(4)               | 3.564(4)              | 176(4)                            |
|                                            | C(13)-H(13B) $\cdots$ O(2) [1-x,2-y,1-z] | 0.97(4)                              | 2.58(4)               | 3.280(3)              | 130(3)                            |
| <b>2a</b>                                  | N(1)-H(1) $\cdots$ O(3)                  | 0.91(3)                              | 1.87(3)               | 2.764(3)              | 171(3)                            |
|                                            | N(3)-H(3A) $\cdots$ S(2)                 | 0.86                                 | 2.67                  | 3.4918(19)            | 159                               |
|                                            | C(3)-H(3) $\cdots$ O(2)                  | 0.93                                 | 2.57                  | 3.275(4)              | 133                               |
|                                            | C(7)-H(7) $\cdots$ S(2)                  | 0.93                                 | 2.81                  | 3.660(3)              | 152                               |
|                                            | C(11)-H(11) $\cdots$ N(2)                | 0.93                                 | 2.28                  | 2.851(3)              | 119                               |
|                                            | C(13)-H(13A) $\cdots$ O(3)               | 0.96                                 | 2.34                  | 2.695(3)              | 101                               |
|                                            | <b>2.1a</b>                              | N(3)-H(1) $\cdots$ S(2) [1-x,-y,1-z] | 0.769(19)             | 2.820(19)             | 3.5541(17)                        |
| N(1)-H(2) $\cdots$ O(3)                    |                                          | 0.88(2)                              | 1.86(2)               | 2.739(3)              | 175.6(19)                         |
| C(7)-H(7) $\cdots$ S(2)                    |                                          | 0.93                                 | 2.83                  | 3.659(2)              | 149                               |
| C(8)-H(8) $\cdots$ O(2)                    |                                          | 0.93                                 | 2.56                  | 3.305(3)              | 137                               |
| C(11)-H(11) $\cdots$ N(2)                  |                                          | 0.93                                 | 2.32                  | 2.893(2)              | 120                               |
| C(14)-H(14A) $\cdots$ O(3)                 |                                          | 0.87(4)                              | 2.30(3)               | 2.586(4)              | 100(3)                            |
| <b>3a</b>                                  | N(3)-H(3A) $\cdots$ O(1)                 | 0.94(3)                              | 2.14(3)               | 2.982(4)              | 150(3)                            |
|                                            | N(5)-H(5) $\cdots$ N(1)                  | 0.95(3)                              | 1.91(3)               | 2.655(4)              | 134(2)                            |
|                                            | C(8)-H(8) $\cdots$ O(3)                  | 0.93                                 | 2.51                  | 3.365(4)              | 152                               |
|                                            |                                          |                                      |                       |                       | 121                               |

|           |                                   |      |      |           |     |
|-----------|-----------------------------------|------|------|-----------|-----|
|           | C(11)-H(11) ...N(2)               | 0.93 | 2.28 | 2.873(4)  | 123 |
|           | C(12)-H(12A) ...O(1)              | 0.97 | 2.47 | 3.100(3)  |     |
| <b>4</b>  | N(3)-H(3A) ...O(2A)               | 0.86 | 2.09 | 2.931(7)  | 165 |
|           | C(7)-H(7) ...O(2A)                | 0.93 | 2.59 | 3.358(8)  | 140 |
|           | C(11)-H(11) ...N(2)               | 0.93 | 2.25 | 2.847(6)  | 121 |
|           | C(12)-H(12A) ...O(2A)             | 0.96 | 2.46 | 2.794(11) | 100 |
| <b>1b</b> | N(2)-H(2) ...O(4) [-1+x,y,z]      | 0.86 | 2.23 | 3.010(3)  | 150 |
|           | N(3)-H(3) ...O(4) [-1+x,y,z]      | 0.86 | 1.96 | 2.800(3)  | 165 |
|           | C(1)-H(1C) ...Br(1)               | 0.96 | 2.89 | 3.390(3)  | 114 |
|           | C(7)-H(7) ...O(1)                 | 0.93 | 2.24 | 2.850(2)  | 123 |
|           | C(12)-H(12B) ...N(1) [-x,1-y,-z]  | 0.96 | 2.59 | 3.470(4)  | 152 |
|           | C(13)-H(13C) ...O(1) [1-x,1-y,-z] | 0.96 | 2.51 | 3.300(3)  | 139 |
